# Supplementary material
Source: Springer Nature journal article supplement (https://www.springermedizin.de/resource/supplementary/12960_2013_430_MOESM3_ESM.pdf/9570066)

How would you generally describe in general your knowledge of the material seen in this Course

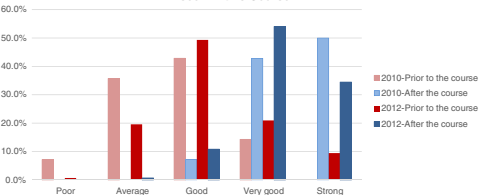

How often did you complete tasks in the course within the expected timeframe?

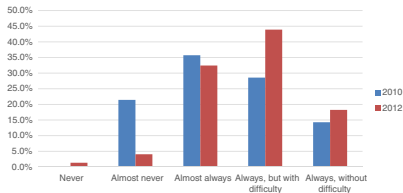

How would you describe your CURRENT ability on:

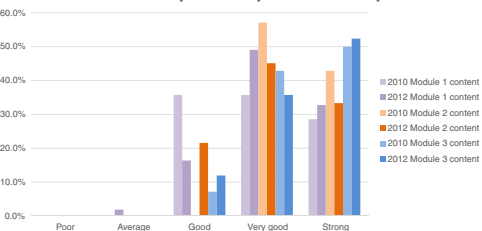

Has your motivation remained high over the course?

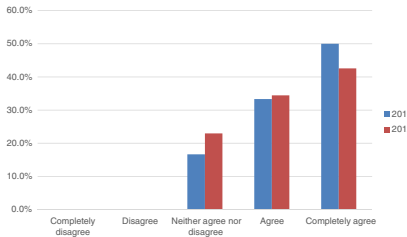

Supplement: MOESM3 [file 9570066]
